# 1 Integration and evaluation of magnetic stimulation in physiology 2 setups

3  
4 Malte T. Ahlers<sup>1</sup>, Christoph T. Block<sup>1</sup>, Michael Winklhofer<sup>2</sup>, Martin Greschner<sup>1</sup>

5 1. Department of Neuroscience, Carl von Ossietzky University Oldenburg, Germany

6 2. Institute of Biology and Environmental Sciences, Carl von Ossietzky University Oldenburg, Germany

## 7 8 9 Abstract

10  
11 A large number of behavioral experiments have demonstrated the existence of a magnetic  
12 sense in many animal species. Further, studies with immediate gene expression markers have  
13 identified putative brain regions involved in magnetic information processing. In contrast, very  
14 little is known about the physiology of the magnetic sense and how the magnetic field is  
15 neuronally encoded. *In vivo* electrophysiological studies reporting neuronal correlates of the  
16 magnetic sense either have turned out to be irreproducible for lack of appropriate artifact  
17 controls or still await independent replication. Thus far, the research field of magnetoreception  
18 has little exploited the power of *ex vivo* physiological studies, which hold great promise for  
19 enabling stringent controls. However, tight space constraints in a recording setup and the  
20 presence of magnetizable materials in setup components and microscope objectives make it  
21 demanding to generate well-defined magnetic stimuli at the location of the biological  
22 specimen. Here, we present a solution based on a miniature vector magnetometer, a coil  
23 driver, and a calibration routine for the coil system to compensate for magnetic distortions in  
24 the setup. The magnetometer fits in common physiology recording chambers and has a  
25 sufficiently small spatial integration area to allow for probing spatial inhomogeneities. The coil-  
26 driver allows for the generation of defined non-stationary fast changing magnetic stimuli. Our  
27 *ex vivo* multielectrode array recordings from avian retinal ganglion cells show that artifacts  
28 induced by rapid magnetic stimulus changes can mimic the waveform of biological spikes on  
29 single electrodes. However, induction artifacts can be separated clearly from biological  
30 responses if the spatio-temporal characteristics of the artifact on multiple electrodes is taken  
31 into account. We provide the complete hardware design data and software resources for the  
32 integrated magnetic stimulation system.

## 33 34 35 Introduction

36  
37 The Earth's magnetic field is used across many animal species for navigation, including  
38 migratory birds, sea turtles, salmon, lobsters, desert ants, and moths (1–6). Currently, there  
39 is increasing interest in the magnetic sense of animals, partly driven by recent advances in  
40 understanding the quantum mechanical process likely underlying the remarkable ability of  
41 migratory birds to sense the earth's magnetic field (7). Furthermore, recent studies suggested  
42 several candidate brain structures for magnetic cue processing in birds (8–14). Most of these  
43 studies, however, do not provide deeper insight into the physiological mechanisms underlying  
44 magnetoreception, since they were mainly focused on the expression of corresponding  
45 immediate early genes. To date, only a few *in vivo* electrophysiological studies on the  
46 magnetic sense are available. Early extracellular recordings that detected magneto-sensitive  
47 neurons in the pigeon's optic tectum (15) turned out to be irreproducible in a technically well

48 controlled replication study (16). Cells in the vestibular brainstem of head-restraint pigeons  
49 exposed to sweeping magnetic field stimuli were found to encode magnetic field direction,  
50 intensity, and polarity (17). This potentially highly relevant study thus far has been confirmed  
51 independently only at the level of immediate early gene expression (13). *In vivo*  
52 electrophysiology work detected electrophysiological responses to magnetic fields in the ros  
53 V nerve of rainbow trout (18), consistent with abolished conditioned magnetic field responses  
54 on trout with anesthetized trigeminal terminals in the snout region (19). However, we are not  
55 aware of independent electrophysiological replication attempts.

56  
57 Thus, *in vitro* and especially *ex vivo* physiological experiments have the potential to close the  
58 knowledge gap to the largely unknown underlying cellular and neuronal mechanisms. For  
59 these experiments, varying magnetic stimuli have to be presented to the studied specimen  
60 while physiological responses (e.g. neuronal activity) are recorded. Here, it is critical to have  
61 full control over the magnetic stimuli, i.e., to generate stimuli with the desired properties and  
62 to verify that they actually have the desired properties. However, the generation and evaluation  
63 of magnetic stimuli for *in vitro* physiology, like single- and multi-electrode extracellular  
64 recordings, intracellular recordings, patch-clamp recordings, calcium imaging, and the like,  
65 share a number of specific methodological problems. In particular, inherently strong space  
66 constraints and the presence of ferromagnetic materials inside the recording setup make it  
67 demanding to integrate defined magnetic stimuli.

68  
69 Common approaches for the generation of spatially homogeneous magnetic stimuli apply coil  
70 system designs according to Helmholtz, Lee-Whiting, Merrit, Alldred and Scollar, or Rubens  
71 (20). While we concentrate on a square Helmholtz-type coil arrangement here, the findings  
72 presented in this paper can be generalized to other systems. In case of Helmholtz coils, for  
73 each axis of stimulation, a pair of coils is needed. Hence, full control of the magnetic stimulus  
74 in three spatial dimensions requires a total of six coils. This poses a problem for *in vitro*  
75 physiology setups, since these are typically space-constricted, in particular, the space around  
76 the studied specimen is limited. Often, it is unavoidable to diverge from ideal Helmholtz  
77 conditions and place the specimen off-center between the coils, to deviate from the ideal  
78 relation between coil distance and coil radius, or to choose a non-ideal coil geometry. These  
79 factors potentially degrade the magnetic field homogeneity at the location of the specimen.  
80 Furthermore, ferromagnetic components in proximity to the site of stimulation disturb the  
81 magnetic field and thereby deteriorate field homogeneity. While it is obviously advisable to  
82 reduce ferromagnetic materials inside a magnetic stimulation setup as far as possible, it is  
83 rarely possible to avoid them entirely or it is prohibitively expensive. Electronic devices, like  
84 preamplifiers or microscope objectives, are situated in close proximity to the site of recording  
85 and in most cases contain small amounts of ferromagnetic components. Additionally,  
86 electrophysiological setups are mostly installed inside of Faraday cages to shield them from  
87 external electromagnetic disturbances. These are often made of ferromagnetic steel due to  
88 their better shielding properties for low frequency electromagnetic fields in comparison to non-  
89 ferromagnetic materials. Also, the building the experiments are performed in, might contain  
90 ferromagnetic structural elements. The presence of such materials distorts the magnetic field  
91 inside the coils and potentially degrades the stimulus quality. The stimulus properties at the  
92 location of the specimen thus have to be verified. However, also in this regard, the spatial  
93 constraints of *in vitro* physiology setups are problematic. The specimens are typically relatively  
94 small (in the order of several millimeters). Most commercially available magnetometers (e.g.  
95 fluxgate magnetometers) are larger than typical physiological recording chambers, more so if

96 three axes of simultaneous measurement are needed for full spatial characterization of  
97 magnetic fields. Smaller devices (e.g. Hall sensors) are typically not sensitive enough. Hence,  
98 these large magnetometers do not fit into the site of recording, at least not without modifying  
99 or removing setup components. It is, however, important that all setup parts are in the same  
100 configuration as during the experiment, since they potentially alter the magnetic field.  
101 Moreover, the characterization of field homogeneity across the specimen is limited with  
102 sensors whose spatial integration area is larger than the specimen itself. In addition, in multi-  
103 axis fluxgate magnetometers, the axes of measurement are often significantly offset from each  
104 other (tens of millimeters) due to the size of the sensory structures.

105

106 Here, we present a three-axis magnetometer design based on anisotropic magnetoresistive  
107 (AMR) sensors commonly used in smartphones. Since these are used as compass sensors,  
108 they are capable of measuring magnetic fields with a sensitivity of fractions (typically in the  
109 100th to 1000th) of the earth's magnetic field in three axes. They are small enough to fit in  
110 common recording chambers of setups for physiological research and have small spatial  
111 integration areas, making them well suited for the purpose. Moreover, we present a design of  
112 a coil-driver circuit that is able to flexibly generate magnetic stimuli, enabling analysis of  
113 biological responses to non-stationary fast changing stimuli. We provide the complete design  
114 data for both devices, i.e. layouts of the printed-circuit-boards, microcontroller firmware, and  
115 high-level calibration software ([www.github.com/mtahlers/magstim](http://www.github.com/mtahlers/magstim)). The Helmholtz coil driver  
116 module can be built by a person with entry-level practical electronics skills. Building the  
117 magnetometer module is slightly more demanding due to the smaller size of the used  
118 components. We present a calibration routine for the magnetometer and the Helmholtz coil  
119 system that compensates for stationary soft- and hard-iron distortions. Finally, we demonstrate  
120 the effect of magnetic induction artifacts in relation to electrophysiological recordings from  
121 retinal ganglion cells and furthermore demonstrate the separability of neuronal spikes and  
122 magnetic stimulation artifacts.

123

124

## 125 **Materials and methods**

126

### 127 *Miniature vector magnetometer*

128 The presented vector magnetometer is based on the QMC5883L 3-axis magnetic sensor (21).  
129 Its package measures 3 mm x 3 mm x 0.9 mm. The sensor deploys the anisotropic  
130 magnetoresistance (AMR) principle, i.e. the change of electrical resistance of a nickel-iron  
131 (permalloy) thin-film element under the influence of an externally applied magnetic field. Four  
132 magnetoresistive elements are connected as a Wheatstone bridge, forming one axis of  
133 sensitivity (22). Hence, three of these structures are arranged perpendicularly to form a full  
134 vector magnetometer. In contrast to older AMR sensors, the QMC5883L offers an integrated  
135 analog front-end and a 16-bit analog-to-digital converter so that the measured magnetic data  
136 can be digitally accessed via an I<sup>2</sup>C bus by a small microcontroller. This significantly reduces  
137 design demands and increases robustness since no external analog circuitry has to be  
138 developed. The QMC5883L applied here is a derivative of the HMC5883L by Honeywell (23),  
139 using the same magnetoresistive technology but with its digital resolution increased from 12  
140 to 16 bit. While the pin-out and the required external circuitry of both sensors are the same,  
141 the internal programming register structure is different, making the sensors not a direct  
142 replacement on the firmware level.

143

144 The QMC5883L is commonly available soldered on break-out printed circuit boards (PCBs)  
145 giving easy access to its electrical connections and providing the circuitry for basic operation.  
146 However, we designed our own carrier PCB for the sensor for two reasons: Firstly, we wanted  
147 to minimize the size of the sensor unit as much as possible. Secondly, we found some of the  
148 electronic components on the commercial break-out PCBs to be strongly ferromagnetic and  
149 therefore to disturb the magnetic measurement in an easily avoidable manner. This was the  
150 case for the pins of some of the ceramic capacitors and for the connection pin header. We  
151 chose a two-part construction for the sensor unit (Fig. 2A). A small PCB only carrying the  
152 QMC5883L was soldered perpendicular to an adapter PCB that is populated with the required  
153 decoupling capacitors in close proximity to the sensor. It also provides the contact points for  
154 connecting the data cable to the interface unit. By this means, a sensor unit with a diameter  
155 of 6 mm was constructed. We provide the detailed schematic and a printed circuit board layout  
156 ([www.github.com/mtahlers/magstim](http://www.github.com/mtahlers/magstim)).

157  
158 The sensor data is transmitted via the synchronous serial bus I<sup>2</sup>C. We chose the 8-bit AVR  
159 microcontroller ATmega168 (24) to control and read out the QMC5883L. The data output rate,  
160 the oversampling factor, and the sensitivity of the measurement are adjusted through a control  
161 register of the sensor. In this register, we set the sensor to the highest data output rate, 200  
162 Hz, to the lowest oversampling, 64x, and to the highest sensitivity of the measurement,  $\pm 2\text{G}$   
163 (see also results).

164  
165 The UART-to-USB bridge IC FT232R (25) is used in our module to connect the AVR  
166 microcontroller to a standard PC. By this means, the connection to the magnetometer  
167 integrates as a virtual serial port into the operating system of the used host computer.

168  
169 For the sake of flexibility, the microcontroller transmits the QMC5883L data to the USB-  
170 attached high-level computer without any data processing. All further conditioning, e.g.  
171 averaging and filtering, of the gathered magnetic data is thus performed on the host PC. A  
172 simple data protocol was chosen for data transmission. Since the sensor outputs the  
173 measured values as a 16-bit signed integer data type, a space-separated triplet of ASCII  
174 encoded numbers ranging from -32768 to 32767 is transmitted, with each number  
175 representing the value of one of the axes. Each data triplet is terminated by the ASCII  
176 characters <CR> and <LF>.

177  
178 The magnetometer connection integrates as a generic COM port into the used operating  
179 system. Hence, practically any operating system and programming language can be used to  
180 receive the data. We used Matlab (Mathworks, MA, USA) to receive and process the  
181 magnetometer measurement data.

182  
183

#### 184 *Calibration of the vector magnetometer*

185 Ideally, a vector magnetometer measures the magnetic field projections ( $B_x$ ,  $B_y$ ,  $B_z$ ) onto three  
186 independent orthogonal spatial axes ( $x$ ,  $y$ ,  $z$ ) with equal gain and zero offset. Hence, if an ideal  
187 magnetometer is arbitrarily rotated in a spatially uniform magnetic field (as the ambient Earth's  
188 magnetic field), all measured coordinates lie on a sphere centered at  $B_x=B_y=B_z=0$  and with a  
189 radius equal to the total field intensity,  $\sqrt{B_x^2 + B_y^2 + B_z^2}$ . However, in practice, different  
190 factors contribute to non-ideal behavior of magnetometers. In AMR sensors, each axis is  
191 measured by four magneto-resistive elements arranged as a Wheatstone bridge. Typically,

192 these elements vary slightly in resistance which leads to a zero-field offset voltage of the  
193 bridge. The offset does not change value or polarity if the magnetic stimulus varies and can  
194 be assumed to be constant over the lifespan of the sensor (26), however, it varies between  
195 different sensors. The offsets of all three axes can be viewed as an addition of a constant error  
196 vector to the measurement. Furthermore, the gain might differ between the different axes of a  
197 sensor. This leads to a deformation of the ideal measurement sphere into an ellipsoid. In  
198 principle, a sensor axis can be weakly sensitive to magnetic fields orthogonal to its main axis,  
199 i.e. showing so-called cross-axis sensitivity (27). This effect can result from uneven  
200 magnetization that the permalloy in AMR sensors might acquire over time. However, as most  
201 modern integrated AMR magnetometers, the QMC5883L has a built-in degaussing  
202 functionality that resets any magnetization bias by applying a magnetic reset-pulse to the  
203 permalloy strips prior to each measurement. In addition to these sensor-intrinsic error sources,  
204 extrinsic factors contribute to the perturbation of the measured magnetic field. Any static  
205 magnetic field source fixed to the reference frame of the magnetometer will bias the measured  
206 field, e.g. magnets or pieces of magnetized material on the sensor's circuit board. These so-  
207 called hard-iron distortions can be described as an offset and together with the zero-field offset  
208 mentioned above can be combined to give a single offset vector for the calibration procedure.  
209 In addition, so-called soft-iron distortions are caused by the induction of magnetic fields into  
210 normally unmagnetized ferromagnetic objects in proximity to the sensor, distorting the  
211 magnetic field lines. The induced soft-iron fields are proportional to the relative magnetic  
212 permeability of the material, thus especially iron and nickel on the circuit board tend to induce  
213 this effect. If these materials are present in proximity to the sensor, their effect is to stretch  
214 and tilt the sphere of ideal measurements.

215  
216 If an uncalibrated magnetic sensor is arbitrarily rotated in a spatially uniform magnetic field,  
217 the sensor's raw x-, y-, and z-component data describe a somewhat distorted sphere, i.e. an  
218 ellipsoid with its center slightly offset. The parameters describing this ellipsoid can be derived  
219 analytically (28). Here, a vector  $\mathbf{V}_{\text{bias}}$  represents the offset of the sphere (bridge offsets and  
220 hard-iron effects). The effects of soft-magnetic distortions, different gain along each axis, and  
221 potential uncompensated cross-axis sensitivity, can all be combined into a single 3 x 3 matrix  
222  $\mathbf{W}$ , so that the uncalibrated readings  $\mathbf{V}_{\text{raw}}$  of the magnetic field (here the raw digital output  
223 value triplets of the sensor) can be mathematically represented as

$$224 \quad 225 \quad \mathbf{V}_{\text{raw}} = \mathbf{V}_{\text{bias}} + \frac{1}{g_{\text{mag}}} \mathbf{W} \cdot \mathbf{B}_{\text{amb}} \quad (1)$$

226 where  $\mathbf{B}_{\text{amb}}$  is the ambient magnetic field (in units of flux density, T), which can be retrieved  
227 by undoing the effects of  $\mathbf{V}_{\text{bias}}$  and  $\mathbf{W}$ , i.e.,

$$228 \quad \mathbf{B}_{\text{amb}} = g_{\text{mag}} \mathbf{W}^{-1} \cdot (\mathbf{V}_{\text{raw}} - \mathbf{V}_{\text{bias}}) \quad (2)$$

229 where  $\mathbf{W}^{-1}$  is the inverse of  $\mathbf{W}$  and  $g_{\text{mag}}$  (in units of flux density per least significant bit of  
230 sensor output, T/LSB) is the scale factor to transform the read-out sensor values into absolute  
231 values of  $\mathbf{B}_{\text{amb}}$  on the basis of a reference measurement with a calibrated magnetometer.

232  
233 Matlab's Sensor Fusion and Tracking Toolbox (Mathworks, MA, USA) provides the *magcal*  
234 function. It determines the calibration parameters corresponding to  $\mathbf{W}^{-1}$  and  $\mathbf{V}_{\text{bias}}$  for sensor

235 raw data that resulted from freely rotating a magnetometer sensor in a homogeneous magnetic  
236 field. Alternatively, other functions based on ellipsoid fitting can be used, e.g., the code  
237 provided with the application note “Ellipsoid or sphere fitting for sensor calibration” (29).

238

239 The earth’s magnetic field strength at the location of the calibration data acquisition was  
240 measured with a calibrated commercial magnetometer (FVM400, Macintyre Electronic Design  
241 Associates).

242

243

#### 244 *Helmholtz Coils*

245 Helmholtz coils are commonly used to generate nearly uniform magnetic fields in the central  
246 region of the coil system. Each pair of coils in a tri-axial coil system ideally consists of two  
247 parallel, equally sized circular or square coils with an identical number of windings. When a  
248 current flows through the windings, the magnetic fields of both coils combine. If the distance  
249 between two circular coils of a pair is equal to their radius  $r$ , the resulting field has a high  
250 homogeneity in the middle between the coils. For two circular coils of radius  $r$ , distance  $d = r$ ,  
251  $n$  windings, powered by current  $I$ , and  $\mu_0$  being the vacuum permeability, the magnetic field  
252 strength  $B$  at the midpoint between the coils is:

253

$$254 \quad B = \mu_0 \frac{nI8}{r\sqrt{125}} \quad (3)$$

255

256 For quadratic coil pairs of side length  $a$ , best field homogeneity is achieved when choosing  
257 the separation distance to be  $d \approx 0.5452 a$  (Kirschvink, 1992). The quadratic x-, y-, and z-  
258 Helmholtz coil pairs, purpose-built for our exemplary setup, had a side length of  $a_x = 223$  mm,  
259  $a_y = 400$  mm, and  $a_z = 162$  mm. For each pair of coils, the distances  $d$  were chosen to satisfy  
260 the condition  $d/a \approx 0.5452$  for maximum field homogeneity. To allow for field blanking (see  
261 next paragraph), the Helmholtz coils in our exemplary setup were double wound. Turns per  
262 coil winding were  $N_x = 32$ ,  $N_y = 53$ ,  $N_z = 19$ . DC resistances of the coil pairs were  $R_x = 10.1 \Omega$ ,  
263  $R_y = 29.9 \Omega$ , and  $R_z = 4.4 \Omega$ , inductances were  $L_x = 1.05$  mH,  $L_y = 5.16$  mH, and  $L_z = 0.24$  mH.  
264 Resistances and inductances were measured by a Fluke PM6306 LCR-meter (Fluke, WA,  
265 USA).

266

267 Time-dependent magnetic stimuli are prone to produce induction artifacts in electronic  
268 devices. This applies all the more to electrophysiological experiments, which rely on high  
269 impedance voltage measurements. The research field of magnetobiology has suffered several  
270 drawbacks, some of which had resulted from improper controls for magnetic field exposure  
271 conditions (30). A recommended control is referred to as sham exposure, which consists in  
272 blanking the magnetic field of an electrically activated coil pair. To allow for blanking, two  
273 independent wires are wound in parallel onto the coil spools that can be connected serially or  
274 anti-serially during operation. This coil type is commonly referred to as double-wrapped (20).  
275 When connecting both windings in series, their magnetic fields constructively add up. By  
276 connecting them anti-serially, the magnetic fields produced around the wires cancel out. For  
277 a sham exposure the identical electrical power is applied to the coil as in the real magnetic  
278 field exposure. Artifacts induced by electrical activation of the coils can be identified by this  
279 means. However, artifacts induced by the magnetic field in the real exposure condition can  
280 obviously not be addressed by this control and need to be identified in the context of the  
281 experiment (see “Induction Artifacts” in Results section).

282

283 Together with the magnetic field an electrical field is produced by the windings of the Helmholtz  
284 coils. However, due to the geometry of the coils the resulting electric field is small in the center  
285 between the coils. In contrast to coils, parallel plates are typically used to produce  
286 homogenous electrical fields. As is the case for the magnetic field, the electric field is canceled  
287 out in the sham condition due to the opposite current polarity in neighboring coil windings.

288

289

### 290 *Helmholtz Coil Drivers*

291 The magnetic field strength produced by Helmholtz coils is proportionally dependent on the  
292 current flowing through its windings. Ohmic losses in the powered coil windings increase the  
293 temperature of the coil which in turn increases the resistance. If the coil is powered by a  
294 constant voltage, the temperature driven rise in resistance will decrease the coil current and  
295 thus the magnitude of the generated magnetic field over time. It is therefore advisable to power  
296 the coils by a constant current source. Any change in the resistance of the coil due to  
297 temperature variation will thereby be counteracted by voltage adjustments by the source,  
298 keeping the current and thus the magnetic field strength at the desired level.

299

300 Figure 1B shows the structure of the voltage-controlled current source implemented for the  
301 Helmholtz coil driver described here. The operational amplifier controls the shunt voltage at  
302 the resistor  $R_{Shunt}$  to be equal to the level at its positive input  $U_{control}$  by adjusting the output  
303 voltage  $U_{out}$  accordingly. According to Kirchhoff's first law, the current through  $R_{Shunt}$  is the  
304 same as through the Helmholtz coil winding (neglecting very small input currents into the  
305 operational amplifier due to its high input impedance). The coil current  $I_{coil}$  is thus

306

$$307 \quad I_{coil} = \frac{U_{control}}{R_{shunt}} \quad (4)$$

308

309 Hence,  $I_{coil}$  can be proportionally controlled by  $U_{control}$  with the proportionality factor defined  
310 by  $1/R_{shunt}$ . Any variation of the control voltage will directly be translated into variations of the  
311 coil current and thus the magnetic field strength.

312

313 We provide the detailed schematic of the module and a printed circuit board layout  
314 ([www.github.com/mtahlers/magstim](http://www.github.com/mtahlers/magstim)). The design only utilizes through-hole-technology  
315 components, making it easy to assemble also for an electronics amateur.

316

317 For the sake of simplicity and robustness of the control circuitry, we chose the OPA548 power  
318 operational amplifier (31). While most operational amplifiers can deliver only small output  
319 currents, the OPA548 provides an integrated power output stage capable of sourcing and  
320 sinking up to  $\pm 3$  A continuously. This reduces the design effort and component count of the  
321 module since no additional discrete power output stage is needed. The current range of  $\pm 3$  A  
322 is well suited for driving medium sized coils as typically needed for physiological experiments.

323

324 Any stabilized bipolar DC voltage source of sufficient voltage and current output can be used  
325 to supply the driver module through its "POWER" connector. The lowest required voltage for  
326 the driver module to operate can be estimated on the basis of the required DC coil voltage  
327 and the dropout voltage of the operational amplifier. For example, if a maximum current of  $\pm 1$   
328 A has to flow through a  $5 \Omega$  coil pair, a voltage of  $U = R \cdot I = \pm 5V$  would be needed according

329 to Ohm's law. The operational amplifier has a maximum dropout voltage of approx. 4 V (31),  
330 it can thus output roughly 4 V less than its supply voltage. For this example, the module should  
331 be supplied with at least  $\pm 9$  V, accordingly. However, step-like changes of the coil current  
332 require larger voltages since  $di/dt = U/L$ , i.e., the larger the supply voltage, the faster is the  
333 transition time between different coil currents and thus magnetic field strengths. On the other  
334 hand, if a steady state current is reached after a step, a power proportional to the difference  
335 of the supply voltage and the actual coil voltage is thermally dissipated by the operational  
336 amplifier ( $P_{diss} = \Delta U \cdot I$ ). Practically, a larger difference between the supply voltage and the  
337 needed DC coil voltage will lead to more heat production by the amplifier. In any case, a  
338 properly dimensioned heat sink should be attached to the OPA548, and in some cases, active  
339 cooling by a fan might be necessary. The chosen current shunt resistor exhibits a very small  
340 temperature coefficient, attaching a heat sink further improves the overall thermal stability.  
341 Moreover, it is advisable to let the amplifier thermally settle after power-on for some time. For  
342 the presented setup, a field step of 50  $\mu\text{T}$  after being powered off for 2.5 hours at room  
343 temperature resulted in an error magnitude of  $0.11 \pm 0.06 \mu\text{T}$  for the first second. A two-hour  
344 random stimulation of 2 second segments of uniformly distributed field vectors of 50  $\mu\text{T}$ , similar  
345 to that in Fig. 5 and 6, resulted in a mean error magnitude of  $0.09 \pm 0.04 \mu\text{T}$ . This fluctuation  
346 is in the same range as the background field stability measured with the magnetometer in the  
347 building.

348

349 The Helmholtz coil pair has to be connected to the "COIL" output of the driver module. For  
350 field blanking, the amplifier circuitry allows to reverse the polarity of one coil winding by means  
351 of a relay. The first winding has to be connected between connection points 1A and 1B of the  
352 circuitry and the second winding between 2A and 2B. These signals are provided by the 9-pin  
353 D-sub connector on the driver board. The onboard relay can then reverse the polarity of  
354 winding B. The "COIL POL." input controls the polarity reversal relay for the half-windings. The  
355 relay is powered from the positive coil supply voltage  $V+$  through a linear voltage regulator. If  
356 just a single continuous coil winding is used, 2A should be shorted to 2B by a low resistance  
357 connection, e.g., a short wire of sufficient diameter.

358

359 The shunt voltage, i.e., the voltage directly proportional to the current through the coils, is  
360 provided at the "U\_SHUNT" output of the module. It can be used to indirectly monitor the coil  
361 current. However, since it is not buffered on the module, high impedance voltmeters should  
362 be connected to it. The current measurements presented in Figure 3A and D were obtained  
363 by recording the voltage on the "U\_SHUNT" output.

364

365 The voltage controlling the magnetic field strength has to be connected to the "FIELD CNTRL"  
366 BNC input of the driver module. This voltage is divided by the potentiometer R4 before  
367 reaching the positive input of the operational amplifier, allowing to adjust the sensitivity of the  
368 module. We used three digital-to-analog output channels of a NI-USB 6343 interface (National  
369 Instruments, TX, USA) to generate the control voltages, connected to the x-, y-, and z-coil  
370 amplifier's "FIELD CNTRL" input, respectively. The fourth analog-out channel of the interface  
371 was used to provide a trigger signal. Three digital output channels of the interface were  
372 connected to the "COIL POL." inputs to control field blanking. The four analog output channels  
373 of the NI-USB 6343 provide 16-bit resolution at a maximum data output rate of 719 kSample/s  
374 per channel.

375



376 The frequency compensation of the amplifier circuitry is adjustable by the trimmer  
377 potentiometer R7. For adjustment, a slow (e.g. 100 Hz) square wave control voltage can be  
378 connected to the “FIELD CNTRL” BNC connector of the driver. The resulting time course of  
379 the coil current can then be monitored by means of the voltage at the U\_SHUNT connector.  
380 Depending on the inductance of the attached Helmholtz coil, a low compensation might lead  
381 to a strong overshoot and ripple of the coil current in response to a step change, while a high  
382 compensation slows down the response, i.e., making it less steep. A compromise between a  
383 fast but potentially overshooting response and a non-overshooting but sluggish step response  
384 has to be found, depending on the application (Fig. 3B, C). In any case, it is very unlikely to  
385 directly elicit any spiking activity by magnetic stimulation with our system as in transcranial  
386 magnetic stimulation. The magnetic field's maximum rate of change attainable with our coil  
387 driver is approx. 5000 times smaller than those applied in typical transcranial magnetic  
388 stimulation systems, and the typically applied absolute field magnitudes are 60000 times  
389 smaller (e.g. (32)).

390

391

### 392 *Calibration of the coil system*

393 An animal moving freely in a spatially uniform ambient magnetic field experiences directional  
394 changes of the field vector. To mimic this inside a research setup, a magnetic vector of a fixed  
395 magnitude with different spatial orientations needs to be produced. However, the magnetic  
396 field generated by Helmholtz coils is subject to the same distortional effects as described for  
397 the magnetometer calibration. Here, hard- and soft-iron-distortion by magnetized or  
398 ferromagnetic setup components lead to similar deformational effects. Thus, as with the  
399 magnetometer calibration, the goal is to invert these deformations. In this case, however,  
400 solving for the inversion parameters can be simplified since the corresponding control voltage  
401 vector and resulting magnetic field vector pairs are known.

402

403 The effective magnetic field,  $\mathbf{B}_{\text{eff}}(\mathbf{r})$  measured with the calibrated magnetometer at any point  
404  $\mathbf{r}$  in the setup can be represented as a vector sum of the following contributions,

405

$$406 \begin{pmatrix} B_{\text{eff},1} \\ B_{\text{eff},2} \\ B_{\text{eff},3} \end{pmatrix} = \begin{pmatrix} B_{\text{hard},1} \\ B_{\text{hard},2} \\ B_{\text{hard},3} \end{pmatrix} + \begin{pmatrix} 1 + \chi_{11} & \chi_{12} & \chi_{13} \\ \chi_{12} & 1 + \chi_{22} & \chi_{23} \\ \chi_{13} & \chi_{23} & 1 + \chi_{33} \end{pmatrix} \cdot \left( \begin{pmatrix} B_{\text{amb},1} \\ B_{\text{amb},2} \\ B_{\text{amb},3} \end{pmatrix} + \begin{pmatrix} B_{\text{coil},1} \\ B_{\text{coil},2} \\ B_{\text{coil},3} \end{pmatrix} \right) \quad (5)$$

407

408 Where  $\mathbf{B}_{\text{hard}}(\mathbf{r})$  is the non-uniform stray field due to the often unavoidable presence of hard-  
409 magnetic components in and around the setup, whose magnetization is invariant of the applied  
410 magnetic field. While  $\mathbf{B}_{\text{hard}}(\mathbf{r})$  typically has only a few small localized sources, both the  
411 ambient magnetic field,  $\mathbf{B}_{\text{amb}}$ , and coil field,  $\mathbf{B}_{\text{coil}}$ , act on a much larger scale and thus can  
412 efficiently magnetize soft-magnetic material, e.g., the electric shield around the setup. The  
413 magnetization induced in the soft-magnetic material by ambient and coil field may diminish,  
414 reinforce, or deflect the magnetic field measured at  $\mathbf{r}$ . The anisotropy terms  $\chi_{ij} (i \neq j)$  in Eq.  
415 (5) account for deflection, while the isotropic terms  $\chi_{ii}$  describe a reinforcement ( $\chi_{ii} > 0$ ) or  
416 diminishment ( $\chi_{ii} < 0$ ) of the field that would be present without soft-magnetic material. We  
417 assume the induced magnetization to be linear because most soft magnetic materials behave  
418 linearly in the magnetic field range of interest here ( $B < 200 \mu\text{T}$ ).

419 The relationship between the voltage applied to the coil and the generated field can be  
 420 expressed most generally as  $\mathbf{B}_{\text{coil},i} = \sum_{j=1}^3 g_{ij} U_j$  where  $U_j$  is the control voltage applied to the  
 421 driver of the  $j$ -th coil axis and  $g_{ij}$  is the voltage-to-field conversion matrix for the coil system  
 422 (units: T/V). Even in an ideal coil system, consisting of three pairs of identical coils, whose  
 423 symmetry axes are orthogonal to one another and intersect in a single point,  $g_{ij}$  would be a  
 424 diagonal matrix only in the center. In all other cases, the off-diagonal elements are finite.

425 Given a spatially uniform ambient field, there are still 15 unknowns ( $\mathbf{B}_{\text{hard},i}$ ,  $\chi_{ij}$ ,  $g_{ij}$ ) at any  
 426 point in the setup, but these need not be determined explicitly if the sole task is to find the  
 427 triplet of control voltages ( $U_1, U_2, U_3$ ) for the coil drivers in order to generate a defined field  
 428 vector  $\mathbf{B}_{\text{eff}}$  at the position of the specimen. In this case, Eq. (5) can be rewritten as a single  
 429 matrix multiplication,

$$430 \begin{pmatrix} B_{\text{eff},1} \\ B_{\text{eff},2} \\ B_{\text{eff},3} \end{pmatrix} = \begin{pmatrix} B_{\text{const},1} & d_{11} & d_{12} & d_{13} \\ B_{\text{const},2} & d_{21} & d_{22} & d_{23} \\ B_{\text{const},3} & d_{31} & d_{32} & d_{33} \end{pmatrix} \cdot \begin{pmatrix} U_1 \\ U_2 \\ U_3 \end{pmatrix} \quad (6)$$

431 where  $B_{\text{const},i} = B_{\text{hard},i} + B_{\text{amb},i} + \sum_{j=1}^3 \chi_{ij} B_{\text{amb},j}$  are the constant terms at the given position,  
 432 which are directly obtained when measuring the effective field with the coils turned off before  
 433 the calibration, i.e.,  $B_{\text{const},i} = B_{\text{eff},i}(U_1 = U_2 = U_3 = 0)$ . Therefore, we have  
 434

$$435 B_{\text{eff},i} = B_{\text{const},i} + \sum_{j=1}^3 d_{ij} U_j \quad (7a)$$

436  
 437 or in matrix notation,

$$438 \mathbf{B}_{\text{eff}} = \mathbf{B}_{\text{const}} + \mathbf{D} \cdot \begin{pmatrix} U_1 \\ U_2 \\ U_3 \end{pmatrix} \quad (7b)$$

439 The task during calibration is to determine the numerical values of the elements  $d_{ij}$  of matrix  
 440  $\mathbf{D}$ . In the calibration routine, a multitude of combinations of voltage triplets (dependent  
 441 variables) are applied while taking the respective field readings (response variables), i.e.,  
 442

$$443 B_{\text{eff},ik} = B_{\text{const},i} + \sum_{j=1}^3 d_{ij} U_{jk} \quad (8)$$

444 where the index  $k$  to  $B_{\text{eff},ik}$  and  $U_{jk}$  refers to the  $k$ -th triplet of voltages. The  $d_{ij}$  values are then  
 445 determined by fitting each Cartesian component of Eq. (8) to the data, using linear regression.  
 446 The matrix  $\mathbf{D}$  then is inverted to obtain the voltage triplets needed to set the field  $\mathbf{B}_{\text{eff}}$ , i.e.,

$$447 (U_1, U_2, U_3)^T = \mathbf{D}^{-1} \cdot (\mathbf{B}_{\text{eff}} - \mathbf{B}_{\text{const}}) \quad (9)$$

448 The mathematical similarity between Eq. (2) for the magnetometer calibration and Eq. (9) for  
 449 the coil calibration reflects the conceptual similarities between the derivations. Therefore, to  
 450 visualize Eq. (8), we follow a similar approach as in the magnetometer calibration, now  
 451 applying a large number of different control voltage triplets of constant magnitude  $|U| =$   
 452  $\sqrt{U_{1,k}^2 + U_{2,k}^2 + U_{3,k}^2}$ , so that  $\mathbf{D}$  acts on a spherical surface in a three-dimensional “voltage  
 453 space” centered at the origin. The resulting distribution of  $\mathbf{B}_{\text{eff}}$  is shifted from the origin by the

454 offset field  $\mathbf{B}_{\text{const}}$  and is typically deformed into an ellipsoid (effect of  $\mathbf{D}$ ). After successful  
455 calibration, the values of  $(U_1, U_2, U_3)$  can be set such that the resulting distribution of  $\mathbf{B}_{\text{eff}}$  is  
456 spherical and centered at the origin so that one can achieve different effective field directions  
457 at the location of the sample while keeping the effective magnetic field intensity constant.

458  
459

#### 460 *Multielectrode recordings with simultaneous visual and magnetic stimulation*

461 We extracellularly recorded electrical activity from retinal ganglion cells of the common quail  
462 (*Coturnix coturnix*) under simultaneous visual and magnetic stimulation. All experiments were  
463 performed in accordance with the institutional guidelines for animal welfare and the laws on  
464 animal experimentation issued by the European Union and the German government. Segments of pigment epithelium attached retina were placed flat, ganglion cell side down, on  
465 a planar array of extracellular microelectrodes. The electrode array consisted of 512  
466 electrodes and covered a rectangular region of 1890  $\mu\text{m}$  x 900  $\mu\text{m}$  (35). The retina was  
467 submerged in Ringer's solution (100 mM NaCl, 6 mM KCl, 1 mM  $\text{CaCl}_2$ , 2 mM  $\text{MgSO}_4$ , 1 mM  
468  $\text{NaH}_2\text{PO}_4$ , 30 mM  $\text{NaHCO}_3$ , 50 mM Glucose), bubbled with carbogen (95%  $\text{O}_2$  and 5%  $\text{CO}_2$ ),  
469 pH 7.5 (33). Recordings were analyzed offline to isolate the spikes of different cells, as  
470 described previously (34). Briefly, candidate spike events were detected using a threshold on  
471 each electrode, and the voltage waveforms on the electrode and neighboring electrodes  
472 around the time of the spike were extracted. Clusters of similar spike waveforms were  
473 identified as candidate neurons if they exhibited a refractory period. Duplicate recordings of  
474 the same cell were identified by temporal cross-correlation and removed.

476

477 Magnetic stimulation consisted of a random sequence of rapid switches between 12 evenly  
478 distributed magnetic field vectors of a magnitude of 50  $\mu\text{T}$  (Fig. 6D, insert). A new magnetic  
479 field vector was chosen every 200 ms. A visual noise stimulus, updating randomly and  
480 independently over time at 120 Hz, was used to calculate the spike-triggered average stimulus  
481 and to characterize the response properties of the recorded cells (Fig. 6F).

482

483 The electrical image of a ganglion cell is the average spatiotemporal spike waveform recorded  
484 across the electrode array during a spike (35) (Fig. 6 A-E). The electrical image of the induction  
485 artifact was calculated as the average waveform across the electrode array during a switch of  
486 the magnetic stimulus. The electrical images of the induction artifact were separated for all  
487 12\*12 stimulus transitions (Fig. 6D). In the presented setup, field changes in x- and y-coil  
488 direction produced the strongest induction. No influence of the individual routing of the  
489 electrode traces on the array was apparent. A linear fit of the peak amplitude to the magnetic  
490 field transition was used as a color map. Recordings were bandpass filtered (80 Hz - 2 kHz)  
491 prior to averaging.

492

493 Unless stated otherwise, all measurements are reported as the mean  $\pm$  standard deviation.

494

495

## 496 **Results**

497

498 Often, the space-restricted nature of typical physiology setups hinders the integration of the  
499 field-generating electromagnetic coil system. Therefore, ideal placement of the coil system is  
500 rarely possible. Figure 1A shows a typical setup for extracellular multielectrode recording from

501 the retina with an integrated three-axis magnetic stimulation system. During recording, the  
502 specimen is situated at the position indicated by the letter S. Ideally, the surrounding three  
503 pairs of Helmholtz coils would be centered around this location. However, the presence of the  
504 recording electronics, microscope, and stimulus projection optics made it necessary to deviate  
505 from this situation, i.e., to place the coils off-center from the specimen, while maintaining the  
506 optimal radius-to-distance ratio (see methods “Helmholtz coils”). Additionally, small amounts  
507 of ferromagnetic materials are present in the nearby setup components, potentially disturbing  
508 the homogeneity of the produced magnetic field. Under these non-ideal conditions, it is  
509 particularly important to evaluate the magnetic field magnitude and homogeneity, since they  
510 might be compromised by these design prerequisites. The region of interest for the magnetic  
511 measurement is typically just a few millimeters in size, and the surrounding recording  
512 chambers are typically just several tens of millimeters wide. Therefore, a sufficiently small  
513 magnetometer is necessary to characterize the magnetic field at the position of the preparation  
514 without removing components of the setup. Due to their size, commercial magnetometers like  
515 fluxgate magnetometers do not fit into recording chambers and integrate over too large areas.  
516

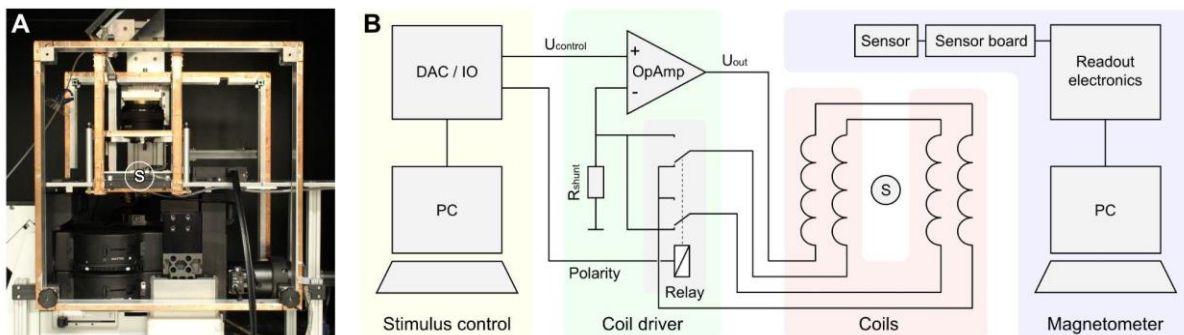

517  
518  
519 **Figure 1:** Electrophysiological setup with an integrated three-axis Helmholtz coil system. **A:** Extracellular  
520 multielectrode recording setup with integrated coils. **B:** Schematic overview of the setup components for the  
521 generation and measurement of magnetic field stimuli. Coil driver and coils are shown for one of three axes. The  
522 placement of the specimen is indicated by the letter S in A and B.  
523

524

### 525 *Magnetometer*

526 We developed a magnetometer based on the 3-axis magnetic sensor QMC5883L (21). To  
527 benefit from the sensor IC's small package size of 3 mm \* 3 mm \* 0.9 mm, the carrier PCB  
528 should be as small as possible. Since the device needs decoupling capacitors in close  
529 proximity, we chose a two-part construction to obtain a compact design: The sensor is placed  
530 on a PCB with a diameter of 6 mm to which a connector PCB is soldered perpendicularly (Fig.  
531 2A). The latter carries the decoupling capacitors and the solder points for the sensor cable.  
532 Thereby, a very compact design of the sensor board was achieved, that can be placed in  
533 typical recording chambers of physiological setups. The sensor raw data is interfaced to a  
534 USB port of a standard PC by readout electronics consisting of a microcontroller and UART-  
535 USB bridge IC.

536

537 We decapsulated a QMC5883L by grinding open its package from the top side, revealing two  
538 spatially separated sensor dies, one integrating the x- and y-axis of measurement, one  
539 implementing the z-axis of measurement (Fig. 2A inset top left). Since the x-y-structure is  
540 monolithically implemented in one die, orthogonality of the x- and y-axis of measurement  
541 can be expected to be very good, also before calibration. Non-orthogonality, potentially introduced

542 by imprecise alignment of the two dies, is compensated by the calibration procedure (see  
543 methods). The spatial integration area of the sensor structures is significantly smaller than the  
544 sensor's package size, namely roughly one-third of it. Obviously, the overall dimension, as  
545 well as the offset between axes, is very small in comparison to fluxgate magnetometers.  
546

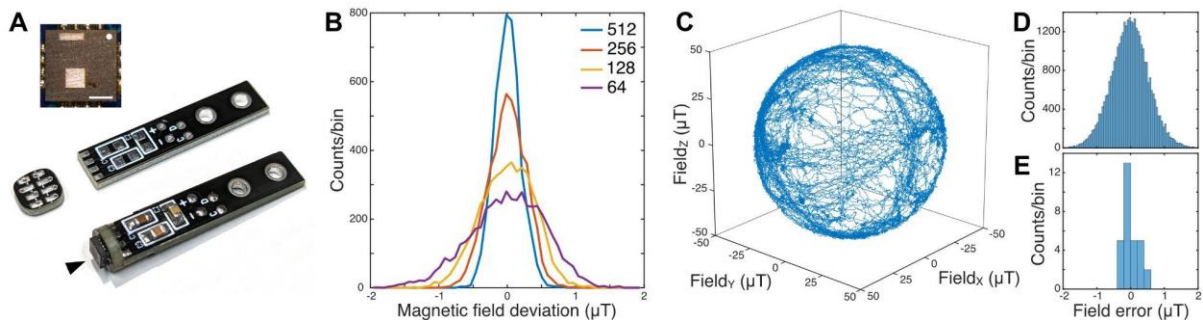

547  
548

549 **Figure 2:** Miniature vector magnetometer. **A:** Two-part sensor board design. The QMC5883L magnetic sensor is  
550 marked by an arrowhead. Sensor 3 mm x 3 mm. Inset top left: Position of the sensor dies inside the QMC5883L  
551 package, top view onto the package. White dot marks pin 1. Inset scale bar = 1 mm **B.** Noise floor of an exemplary  
552 QMC5883L for the four available oversampling settings 64x - 512x. **C.** Trajectory of rotating the sensor in the  
553 natural earth magnetic field (49 μT) for approximately 3 minutes after calibration on the smallest oversampling  
554 setting. **D.** Residuals between the trajectory data in C and a homogeneous natural field. **E:** Residuals as in D  
555 averaged over 15 s to reduce noise for 30 stationary orientations in the natural magnetic field.

556

557

558 We compared four exemplary sensors by applying the calibration procedure as described  
559 below to obtain the axes' gain and offset values of each device. The sensors had gains of  $7.85 \pm 0.19$  nT per least significant bit ( $n=4$  sensors). On average, the magnitude of the offset vector  
560 of the four sensors was  $1.09 \pm 0.49$  μT. We determined the noise floor of the calibrated sensors  
561 by exposing them stationarily to the earth's magnetic field (49.0 μT, natural field in Oldenburg,  
562 Germany) (Fig. 2 B). The QMC5883L provides internal data averaging over a window of 64,  
563 128, 256, or 512 data points, and data output rates of 10, 50, 100, and 200 Hz, both adjustable  
564 via the sensor's control register (21). While the different data output rates did not have any  
565 influence on the noise of the sensor data, larger averaging windows decreased the noise floor,  
566 as expected (std 0.54, 0.39, 0.27, and 0.19 μT for 64x, 128x, 256x, and 512x oversampling).  
567 All values are in good accordance with the respective datasheet values (21). In our  
568 magnetometer firmware, we set the sensor to the fastest output rate (200 Hz) and the lowest  
569 oversampling value (64x). By this means, the magnetometer provides the fastest possible  
570 response to field changes. To increase the sensor's precision, averaging over constant field  
571 conditions or filtering techniques can be applied downstream in real-time or offline (e.g. Fig.  
572 2E).  
573

574

575

### 576 *Magnetometer calibration*

577 Optimally, the calibration of the magnetometer is performed in a calibrated coil system that is  
578 able to provide arbitrary magnetic fields. If a calibrated coil system is not available, a procedure  
579 can be applied that is similar to the calibration routine for smartphone-integrated compasses.  
580 Correspondingly, the sensor board of our magnetometer was randomly rotated in the  
581 undisturbed earth magnetic field, i.e. sufficiently far away from buildings and other structures  
582 potentially containing metal. The magnetic field strength at the location of data collection was  
583 49.0 μT. The x-, y-, and z-axis raw data of the sensor lie on a deformed sphere offset from the

584 origin (see methods). The offset values and deformation matrix were extracted by the  
585 calibration routine (see methods). Applying those to the raw sensor output data made them  
586 spherical and zero-centered (Fig. 2C). After calibrating the exemplary sensor in the local earth  
587 magnetic field (49  $\mu\text{T}$ ), the mean field error was close to zero (0.02  $\mu\text{T}$ ) and the standard  
588 deviation was 0.55  $\mu\text{T}$  (Fig. 2D). To estimate the accuracy of the calibrated magnetometer in  
589 the absence of the sensor's noise floor, we placed the calibrated magnetometer stationarily in  
590 multiple arbitrary orientations in the natural magnetic field and averaged data in every position.  
591 For the exemplary sensor and calibration procedure, the residuals between the averaged data  
592 and a homogeneous natural field were close to zero (0.01  $\mu\text{T}$ ) and had a standard deviation  
593 of 0.23  $\mu\text{T}$ , which corresponds to an error of 0.47% of the measured magnitude of 49  $\mu\text{T}$  (Fig.  
594 2E).

595  
596

### 597 *Helmholtz Coil Drivers*

598 Helmholtz coils are preferably driven by a constant current source since their generated  
599 magnetic field is directly dependent on the current. By this means, changes in the coil  
600 resistance, resulting from temperature changes of the coil, do not influence the magnetic  
601 output of the coils. The core of the coil driver design is an operational amplifier with an  
602 integrated power output stage (Fig. 1B). The amplifier circuitry translates a control voltage into  
603 a proportional current, that is powering the Helmholtz coils. The proportionality factor of the  
604 voltage-to-current conversion is defined by a shunt resistor.

605

606 To characterize the linearity of the coil amplifier, we increased the control voltage from a value  
607 resulting in a magnetic field strength of approx -100  $\mu\text{T}$  to a value resulting in approx. 100  $\mu\text{T}$ .  
608 We measured the voltage drop at the current shunt to obtain the corresponding coil current  
609 ( $I_{coil} = U_{Shunt} / R_{Shunt}$ ). Simultaneously, we measured the generated magnetic field magnitude  
610 by the analog output of a commercial magnetometer (FVM400, Macintyre Electronic Design  
611 Associates). The deviation from a linear fit to the data was minimal (Fig. 3A).

612

613 For the exemplary 3-axes coil system presented here, we adjusted the frequency  
614 compensation (see methods) to allow a moderate overshoot of ~15% on all axes, bringing the  
615 system in a steady state below 500  $\mu\text{s}$  (Fig. 3B). We applied sinusoidal control voltage  
616 oscillations between 0.1 Hz and 50 kHz with an amplitude corresponding to a steady state  
617 magnetic field strength of ~50  $\mu\text{T}$  and measured the amplitude and phase shift of the resulting  
618 sinusoidal coil current (Fig. 3C). In accordance with the step response, the frequency response  
619 showed only minor amplitude attenuation and phase shift up to 1 kHz.

620

621 By means of a coil polarity reversal relay, the magnetic field produced by the Helmholtz coils  
622 can be blanked while the windings are still under current. This is commonly used as an  
623 experimental control condition (sham magnetic stimulus, e.g. 36–39). If activated, the  
624 magnetic field is reduced to the ambient field strength present inside the setup (Fig 3D).

625

626

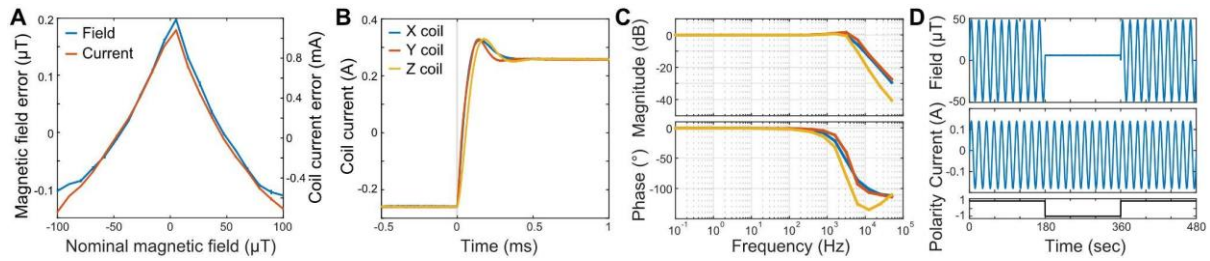

627  
628

629 **Figure 3: Coil amplifier.** **A:** Coil amplifiers show an approximately linear response over a large range. Magnetic  
630 field strength and coil current were measured for a control voltage sweep corresponding to a magnetic field strength  
631 of approx -100 μT to 100 μT. Residuals of a linear fit of magnetic field and coil current are shown. Average of 3  
632 repeats, error bars: ±SD. **B:** Coil current responses to a control voltage step for the three coils corresponding to a  
633 transition from -100 to 100 μT. Frequency compensation was adjusted for maximal speed of the transition and  
634 minimal overshoot. **C:** Bode plots of amplitude attenuation (top) and phase shift (bottom) of the coil current for  
635 sinusoidal control voltages from 0.1 Hz to 50 kHz at ± earth magnetic field strength. **D:** Field blanking. By switching  
636 the coil wiring from serial to anti-serial (bottom) the magnetic field produced by the coils is canceled out (top) though  
637 the coils are still under current (middle). Note that the offset corresponds to the remaining natural magnetic field.

638

639

### 640 *Setup calibration*

641 Control voltage vectors, which were uniformly distributed on a sphere, were applied to the coil  
642 drivers to calibrate the coil system. The resulting magnetic vectors inside the setup were  
643 measured at the location of the specimen with the miniature vector magnetometer. Similar to  
644 the magnetometer calibration, they resembled a distorted sphere, i.e., an ellipsoid, due to  
645 differing coil gains for the three axes and soft- and hard-iron distortions by components inside  
646 the setup. The parameters describing the transformation from the control voltages to the  
647 effective magnetic field strength at the position of the specimen were determined by linear  
648 regression. These parameters were then used to derive the coil amplifier control voltages that  
649 resulted in the desired magnetic vectors (see methods). The magnetic target vectors with a  
650 magnitude of 50 μT each were compared to the resulting vectors (Fig. 4A). The field error  
651 between target and actual vectors in magnitude was  $0.003 \pm 0.142 \mu\text{T}$  (Fig. 4B) and  $0.191 \pm$   
652  $0.09 \mu\text{T}$  (mean ± std) in Euclidean distance (Fig. 4C).

653

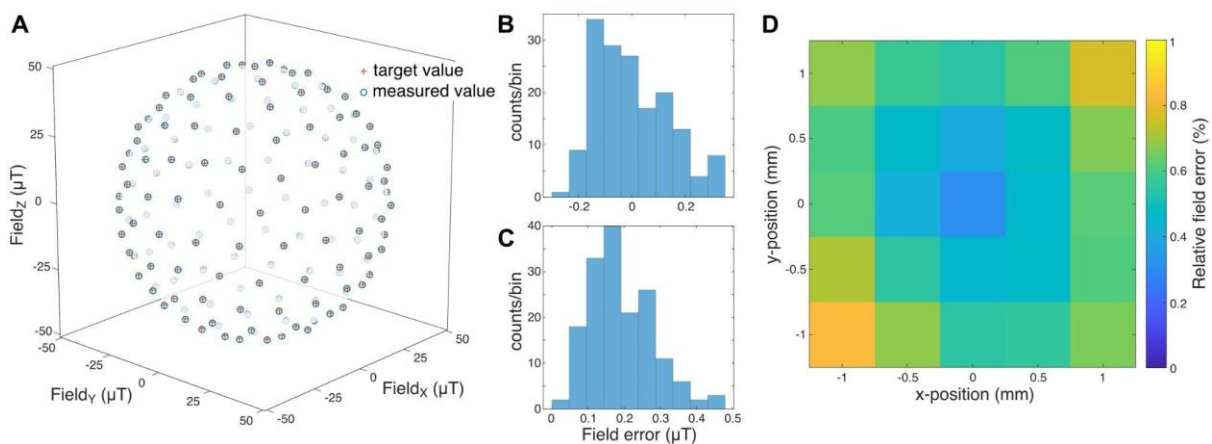

654

655

656 **Figure 4: Setup calibration.** **A:** Precision of 162 uniformly distributed field vectors in the calibrated setup. Red  
657 crosses: target vector, blue circles: measured field vector **B:** Magnitude deviations from the target of 50 μT. **C:**  
658 Euclidean distance between target and measured field vector. **D:** Field homogeneity in a 2 mm \* 2 mm area in the  
659 recording chamber. At each location a spherical magnetic field stimulus with 44 vectors was analyzed. For each  
660 location, the mean Euclidean error is shown in percent of the target radius.

661  
662  
663  
664  
665  
666  
667

To test the spatial homogeneity of the generated field we consecutively placed the magnetometer in a grid of 5\*5 positions in increments of 500  $\mu\text{m}$ . We measured the accuracy of the stimulation at those locations and the average field error was determined (Fig. 4D). For the sampled area, the field error was below 1%.

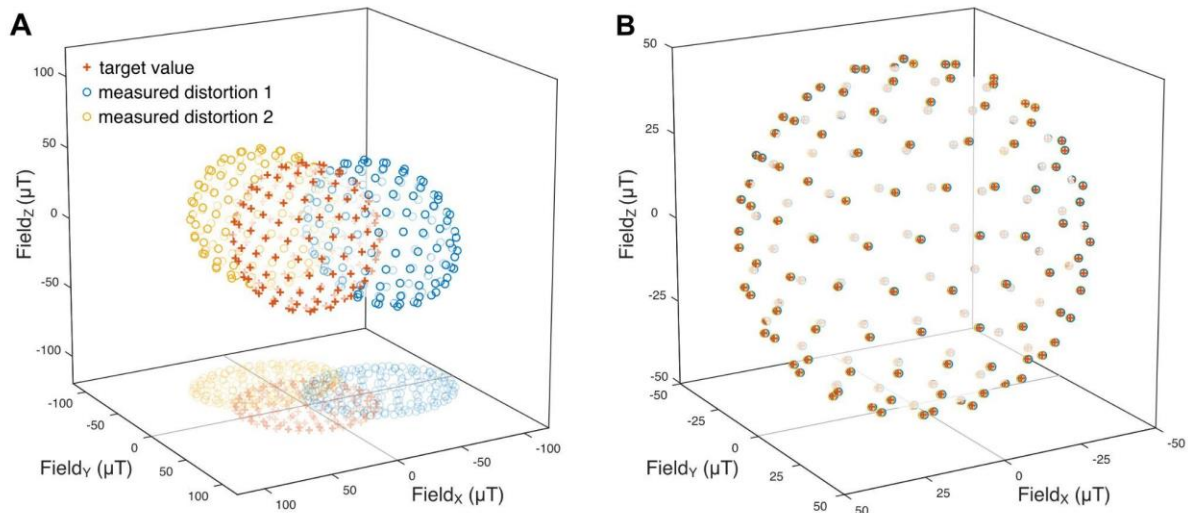

668  
669  
670  
671  
672  
673  
674  
675  
676

**Figure 5:** Compensation of strong distortions. **A:** A ferromagnetic steel bar was placed inside a previously calibrated setup in two orientations and a magnetic sphere stimulus with a target radius of 50  $\mu\text{T}$  was applied (red crosses). The resulting sphere was offset and deformed for both positions of the metal bar (blue and yellow circles). **B:** After calibration, offset and deformation of the sphere were largely reduced, yielding average errors of 0.63% (distortion 1, blue circles) and 0.51% (distortion 2, yellow circles).

To demonstrate the potential of the presented calibration technique, we purposefully introduced a strong source of magnetic field distortion into our physiological setup and corrected its field-deteriorating effects as far as possible (Fig. 5). We placed a 100 mm x 25 mm x 25 mm (approx. 500 g) ferromagnetic steel (mild steel) bar in two orientations (parallel to the magnetic y-axis, and parallel to the z-axis) in close proximity to the recording chamber inside our setup, which was beforehand calibrated without the metal bar, and estimated the accuracy as before. As expected, the metal bar led to strong distortions of the stimulus in both positions. By recalibrating the coil system in presence of the steel bar, the mean Euclidean error could be reduced to 0.5% (distortion 1) and to 0.6% (distortion 2), respectively. However, the spatial inhomogeneity, measured as in figure 4D over an area of 2 mm x 2 mm, was increased to 5%.

688  
689

### *Induction artifacts*

Finally, with the generation and verification of the magnetic stimulation under control, the use of magnetic stimulation in electrophysiological methods faces another obstacle. Magnetic field transitions induce currents in conductive material, and the high impedance recordings common in electrophysiology are particularly sensitive to these small inductive artifacts. They might be picked up by the electrodes themselves, the headstage, or connecting cables. Therefore, one has to separate potential biological responses to the magnetic field transitions from the induced artifacts. The most straightforward difference between these two is the small

697



698 latency between the field transition and the induction artifact in comparison to latencies of  
 699 biological origin. However, this can only be exploited in certain experimental designs. Another  
 700 distinctive feature may be the temporal waveform, as one would assume that induction  
 701 artifacts have very different temporal waveforms in comparison to biological responses. In  
 702 contrast, due to the low pass filter properties of the recording equipment, these waveforms  
 703 can indeed be quite similar when responses on individual electrodes are considered. However,  
 704 if one studies the signals simultaneously on multiple electrodes, the difference becomes quite  
 705 apparent in all cases (Fig. 6A-D). Biological spikes originate at the axon hillock, backpropagate  
 706 through the dendritic tree, and travel along the axon. The same spike is recorded differently  
 707 on multiple electrodes while the induction artifact is observed over large areas identically and  
 708 simultaneously. Common spike sorting algorithms that include simultaneous signals from  
 709 multiple electrodes as from tetrodes or multi-electrode arrays generally classify artifacts and  
 710 spikes reliably, as the signals are in this regard quite different (Fig. 6E). The strength of the  
 711 induction strongly depends on the particular arrangement of the recording equipment relative  
 712 to the coils. In our case, the strongest induction was seen for strong transitions in the coils in  
 713 both X and Y direction, while the coils for the Z direction had little influence (Fig. 6D) ( $[x, y, z]$   
 714  $= [-0.74, 0.67, 0.07]$ ,  $R^2 = 0.990$ ). This coincides with the planar structure of the electrode array  
 715 and the PCB of the headstage. As expected, activation in the opposite polarity of the X and Y  
 716 coils lead to an induction of opposite polarity.  
 717

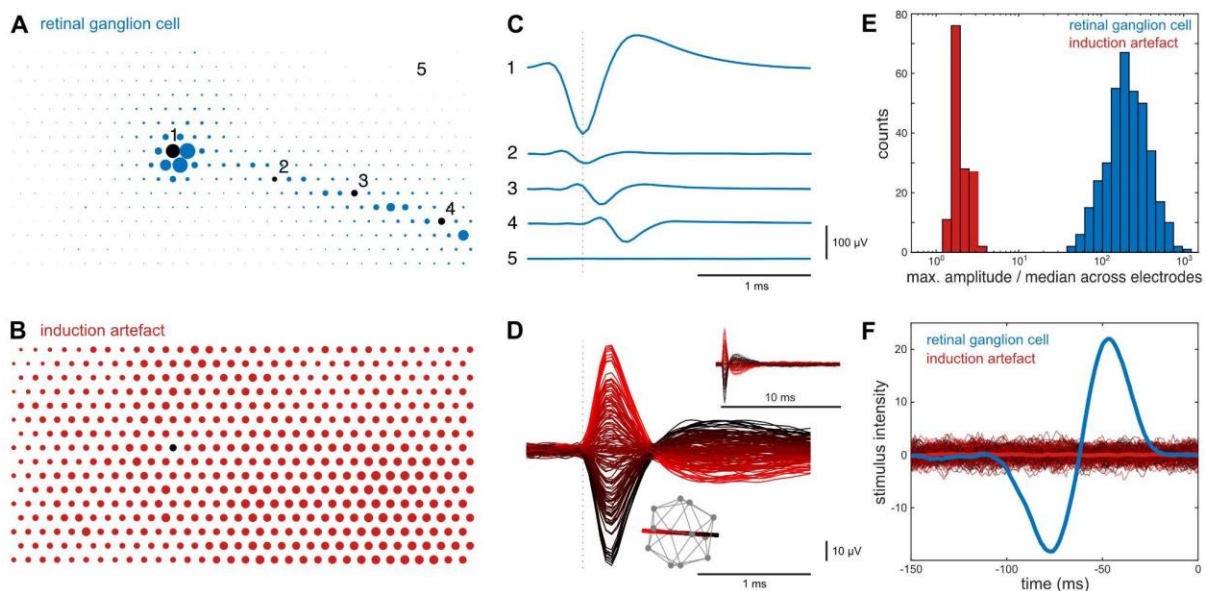

718  
 719  
 720 **Figure 6:** Rapid transitions of the magnetic field induce distinct electrical artifacts in the recording equipment. Multi-  
 721 electrode array recording of quail retinal ganglion cells. **A:** Representation of the signal strength of a ganglion cell  
 722 spike across the 512 electrodes of a multielectrode array. Dot size represents absolute signal amplitude. For visual  
 723 clarity, maximal amplitudes are shown smaller than to scale. **B:** As A for an induction artifact. The black dot  
 724 corresponds to position 1 in A. **C:** Average spike waveform on five electrodes marked in A. Note the strong signal  
 725 at the cell soma location (1) and the increasing delay of the signal on the electrodes along the axon (2-4). **D:**  
 726 Temporal induction artifact on electrode 1 as in C for 12\*12 magnetic field transitions. Dashed line indicates the  
 727 time of field transition. Bottom inset illustrates the icosahedron of the 12 used magnetic field vectors. The red-to-  
 728 black line represents the axis with the strongest inductive effect and is used as the color map. Top inset: The same  
 729 induction artifact at a longer time scale. **E:** Biological spikes (blue, n=367 quail retinal ganglion cells) and induction  
 730 artifacts (red, n=144) have different spatiotemporal waveforms. Note logarithmic binning. **F:** Event-triggered  
 731 average visual stimulus for spikes of the neuron in A (blue) and all magnetic field transitions (color map as in D).  
 732 Thick red line: mean over all field transitions. Triggered average stimulus confirmed a clean classification with a

733 normal light ON response for the neuron in A and no correlation between the visual stimulus and the induction  
734 artifacts, as expected.

735

736

## 737 **Discussion**

738

739 We presented a system for magnetic stimulation and stimulus verification for physiological  
740 experiments, consisting of a miniature vector magnetometer and a current driver for  
741 electromagnetic coils, e.g., Helmholtz coils.

742

743 Due to tight space constraints in physiology research setups, non-ideal placement and/or  
744 geometry of the magnetic field generating coils is often necessary. Furthermore, the presence  
745 of field-disturbing ferromagnetic components inside the setup can be rarely avoided  
746 completely. Thus, it is important to verify the magnetic stimulus with a miniature magnetometer  
747 probe at the position of the specimen. Three-axes magnetometers based on small-sized Hall-  
748 effect sensors exist but are in general significantly less sensitive than e.g. fluxgate  
749 magnetometers. The latter are thus typically used for measuring small fields but are in turn  
750 bulkier. Therefore, we use a small-sized AMR three-axis magnetic field sensor to build a vector  
751 magnetometer whose sensor unit is small enough to fit in typical recording chambers of  
752 physiological setups, while being sufficiently sensitive to measure small fields. The sensory  
753 structures inside the sensor package are below 1 mm, resulting in a correspondingly small  
754 spatial integration area of the magnetic measurements. This is beneficial for the analysis of  
755 stimuli for small size biological specimens since it offers higher spatial resolution than larger  
756 magnetic probes. Only if ferromagnetic components that are smaller than the magnetometer's  
757 spatial integration area are brought in close proximity to the specimen during stimulation, field  
758 inhomogeneities on scales below the spatial resolution of the sensor are to be expected. While  
759 purely analog AMR sensors were used in research on magnetoreception (16), the application  
760 of modern sensors with integrated analog frontend, A/D conversion, and digital data output,  
761 as presented here, greatly reduces the technological effort and thus facilitates the  
762 establishment of a robustly working system.

763

764 Optimally, the presented magnetometer is calibrated in a reference magnetic field provided by  
765 a calibrated coil system. Since such a system might not be readily available in physiology labs,  
766 we adapted a simple calibration method that is commonly used for smartphone integrated  
767 magnetometers. It has the advantage that it can easily be performed in a homogenous field of  
768 known magnitude, like the Earth's magnetic field.

769

770 The used QMC5883L sensor was originally intended as a magnetometer for high-volume  
771 consumer applications like smartphones with power consumption and space constraints.  
772 While its small size is a key feature for the context described here, it cannot be expected to  
773 achieve the accuracy, bandwidth, and noise properties as dedicated devices like commercial  
774 fluxgate magnetometers. However, the typical physiology laboratory-use scenario of the  
775 magnetometer as a stimulus calibration and verification instrument allows long data averaging  
776 periods or repeated measurements. By this means, we achieved an accuracy of approx. 0.5%  
777 of the natural magnetic field.

778

779 We introduce a bipolar coil current driver design that is able to power coils with up to  $\pm 3A$ . The  
780 current range is optimized for small to medium-sized coil systems typically used in physiology

781 setups, avoiding over-dimensioned control and supply devices for this use case. Contrary to  
782 the at times employed approach of constant voltage supply of coil systems, our constant  
783 current driver circuit eliminates the problem of decreasing magnetic output caused by coil  
784 heating through ohmic losses during operation. As a commonly used control for one type of  
785 possible artifacts, the driver offers polarity reversal of one winding of a double-wrapped coil,  
786 thereby blanking the magnetic field generation while keeping the coils electrically active. Due  
787 to its modular approach, the coil driver circuit can easily be integrated into running systems, if  
788 free analog-out channels for field control are available. Any standard bipolar lab power supply  
789 unit can be used to power the driver if the required voltages and currents can be delivered.  
790 The circuitry can simply be multiplied according to the number of magnetic stimulation axes  
791 desired, hence systems with 1-, 2-, or 3-dimensional stimulation can flexibly be set up. We are  
792 successfully using the amplifier design for three-axis quadratic Helmholtz-type magnetic  
793 stimulation in a multi-electrode electrophysiology setup. While coil system designs according  
794 to Lee-Whiting, Merrit, Alldred and Scollar, or Rubens offer better field homogeneity over  
795 larger areas than Helmholtz coils, they require more coils (between 3 and 5) per axis (20).  
796 Thus, for space-constricted *in vitro* physiology setups, Helmholtz coil systems have the  
797 advantage of occupying less space than the other designs. The disadvantage of a smaller  
798 region of high field homogeneity is typically acceptable since the specimens of *in vitro*  
799 physiology are small in most cases. While we applied the presented coil driver to a square  
800 Helmholtz-type coil arrangement, the driver can be used with other coil arrangements within  
801 the current specifications.

802  
803 In general, heat production by the coil system is a concern in bioelectromagnetic studies (40).  
804 Since temperature is an omnipotent physiological parameter (41), temperature effects on the  
805 specimen caused by coil heating may obscure real effects or be mistaken for them. However,  
806 this is an issue primarily in studies with field strengths significantly higher than the earth's  
807 magnetic field. In case of our exemplary Helmholtz coil system, no significant temperature  
808 increase of the coils was apparent in their normal operational range. Furthermore, the coils  
809 are not in heat-conducting contact with the recording chamber, and the specimen is often  
810 temperature controlled in physiology setups. For certain stimulus conditions one can exploit  
811 the fact that a sham stimulation using double-wrapped coils produces the same amount of  
812 heat as the non-sham stimulation.

813  
814 If disturbances of the generated magnetic stimulus are identified by the magnetometer, a  
815 simple setup calibration technique can be applied which compensates for stationary soft- and  
816 hard-iron disturbances. We applied the calibration technique to our multi-electrode  
817 electrophysiology setup as an example of a typical physiology research setup. While we  
818 avoided the use of ferromagnetic materials when building the setup, small amounts are  
819 present in the used microscope objectives and in the recording electronics in close proximity  
820 to the preparation. After setup calibration, we achieved an average field error below 0.4% of  
821 a magnetic vector of a given magnitude and a spatial field homogeneity better than 1% in an  
822 area of 2 mm \* 2 mm at the position of the recorded specimen. This is more than sufficient for  
823 the physiological study of magnetoreception in the foreseeable future. These results obviously  
824 depend on the properties of the specific setup. In addition, instead of calibrating the field for  
825 one central region, one could alternatively optimize homogeneity of the full recording area at  
826 once. To further elucidate the potential severity of distortions inside the setup, we  
827 compensated for extreme field disturbances introduced by a ferromagnetic steel bar of approx.  
828 500 g. In this case, the magnitude error for a given location was still below 1%. But as

829 expected, spatial field homogeneity was more strongly compromised (5% error in an area of  
830 2 mm \* 2 mm). While these strong distortion sources are obviously an exaggeration of what  
831 might realistically be present in an actual research setup, it shows that even these can be  
832 compensated to a potentially acceptable degree by the suggested calibration technique. In  
833 fact, the local stimulus quality is within the acceptable limits for experiments on smaller  
834 specimens, like single-cell recordings.

835  
836 Since magnetic artifacts in recordings are induced by magnetic field changes, fast transition  
837 times between magnetic stimuli help shorten the artifacts. Hence, if instantaneous magnetic  
838 stimulus changes are applied in a recording, they will occur transiently with very short latencies  
839 in comparison to biological responses and can be excluded from the analyses. On the other  
840 hand, if slow magnetic stimuli are applied, the induced artifacts can be expected to be smaller  
841 in amplitude because less change of the magnetic field per time will result in smaller artifact  
842 induction (42). Magnetic stimulus transitions might be chosen to be slow enough to fall below  
843 the physiological recording's frequency band. Thanks to its wide frequency band our coil driver  
844 is well suited for both approaches. If possible, the induction artifact should be further minimized  
845 e.g. by the arrangement of the cables or the use of twisted-pair cables (42). If spike sorting  
846 with multiple electrodes is possible, the induction artifact is easy to separate from biological  
847 signals. However, due to the filter properties of the stimulation and recording devices, the  
848 artifact waveform on a single electrode can resemble a biological spike, and particular care in  
849 the experimental design is needed. Additionally, control conditions like the pharmacological  
850 block of synaptic transmission or cooling of the neuronal tissue can be applied to distinguish  
851 between stimulation artifacts and physiological responses.

852  
853 In combination with commonly available computer-controlled digital-to-analog interfaces, our  
854 coil driver allows easy implementation of complex stimulation paradigms that can be applied  
855 automatized to the studied specimen. In our exemplary multi-electrode recording setup, we  
856 simultaneously stimulate the specimen visually and magnetically. By this means, our setup  
857 enables the generation of synchronized multimodal stimuli that, for example, can simulate  
858 natural animal behaviors like birds' head scanning movements before take-off (43). On the  
859 other hand, due to the fast response time of the coil amplifier, also less natural system-theory-  
860 inspired stimulation paradigms can easily be implemented, like randomly fast changing  
861 magnetic noise stimuli for reverse correlation analyses. While our coil driver design was  
862 dimensioned according to the demands of physiological *in vitro* research setups, it can as well  
863 be applied to *in vivo* experimentation.

864  
865 Magnetic stimulation is error-prone since the stimuli are not directly detectable by the  
866 experimenter, as opposed to visual stimuli, for instance. Therefore, it is good practice to  
867 monitor the magnetic field during the experimental procedure to avoid stimulation errors (16).  
868 Due to the digital data transmission between the sensor PCB and the read-out electronics of  
869 the magnetometer (Fig. 1B), the connecting cable can be several meters long without  
870 impairing the quality of the measured data. In addition, the small size makes the  
871 magnetometer well suited to be permanently installed inside a physiology setup for stimulus  
872 control. If required by the experimental design, a closed-loop stimulation can be implemented  
873 with minimal effort. If magnetometer read-out and stimulation control are performed by the  
874 same software platform (e.g. Matlab), the magnetometer data can easily be fed back into the  
875 stimulus generation. This is beneficial if the exact placement of setup components cannot be  
876 kept unaltered over experiments, which would otherwise require a recalibration of the system.

877 However, in this case, the overall timing constraints of the magnetometer's data transmission  
878 (maximum data output rate of 200 Hz, USB latency, and jitter) have to be evaluated in regard  
879 to the intended stimulation.

880

881 While the presented methodology was developed in the context of multi-electrode recordings,  
882 it can easily be used with other physiological techniques that share similar inherent problems  
883 in regard to the generation and evaluation of magnetic stimuli. In conjunction, the presented  
884 miniature vector magnetometer, coil driver, and coil calibration technique are well suited to  
885 establish a reliable magnetic stimulation system for a wide variety of physiology setups, i.e.  
886 for strongly space-constricted setups dedicated to experiments with small specimens.

887

888

889 **Acknowledgements:** We thank C. Puller and H. Mouritsen for their valuable comments on  
890 the manuscript. Research was supported by SFB 1372, Deutsche Forschungsgemeinschaft  
891 (MG and MW) and RTG 1885/2, Deutsche Forschungsgemeinschaft (MG and MW).

892

893

894 The complete hardware design data and software resources are open source under the  
895 Creative Commons Zero v1.0 Universal license ([www.github.com/mtahlers/magStim](http://www.github.com/mtahlers/magStim)).

896

897

898

## 899 References

900

- 901 1. Mouritsen H. Long-distance navigation and magnetoreception in migratory animals.  
902 Nature. 2018 Jun;558(7708):50–9.
- 903 2. Lohmann KJ, Lohmann CMF, Ehrhart LM, Bagley DA, Swing T. Animal behaviour:  
904 geomagnetic map used in sea-turtle navigation. Nature. 2004 Apr 29;428(6986):909–10.
- 905 3. Putman NF. Animal Navigation: Seabirds Home to a Moving Magnetic Target. Curr Biol  
906 CB. 2020 Jul 20;30(14):R802–4.
- 907 4. Boles LC, Lohmann KJ. True navigation and magnetic maps in spiny lobsters. Nature.  
908 2003 Jan 2;421(6918):60–3.
- 909 5. Fleischmann PN, Grob R, Rössler W. Magnetosensation during re-learning walks in  
910 desert ants (*Cataglyphis nodus*). J Comp Physiol A [Internet]. 2021 Oct 22 [cited 2022  
911 Mar 8]; Available from: <https://doi.org/10.1007/s00359-021-01511-4>
- 912 6. Dreyer D, Frost B, Mouritsen H, Günther A, Green K, Whitehouse M, et al. The Earth's  
913 Magnetic Field and Visual Landmarks Steer Migratory Flight Behavior in the Nocturnal  
914 Australian Bogong Moth. Curr Biol. 2018 Jul 9;28(13):2160-2166.e5.
- 915 7. Xu J, Jarocha LE, Zollitsch T, Konowalczyk M, Henbest KB, Richert S, et al. Magnetic  
916 sensitivity of cryptochrome 4 from a migratory songbird. Nature. 2021  
917 Jun;594(7864):535–40.
- 918 8. Zapka M, Heyers D, Hein CM, Engels S, Schneider NL, Hans J, et al. Visual but not  
919 trigeminal mediation of magnetic compass information in a migratory bird. Nature. 2009  
920 Oct;461(7268):1274–7.
- 921 9. Heyers D, Zapka M, Hoffmeister M, Wild JM, Mouritsen H. Magnetic field changes  
922 activate the trigeminal brainstem complex in a migratory bird. Proc Natl Acad Sci. 2010  
923 May 18;107(20):9394–9.
- 924 10. Wu LQ, Dickman JD. Magnetoreception in an avian brain in part mediated by inner ear  
925 lagena. Curr Biol CB. 2011 Mar 8;21(5):418–23.
- 926 11. Keary N, Bischof HJ. Activation changes in zebra finch (*Taeniopygia guttata*) brain areas  
927 evoked by alterations of the earth magnetic field. PloS One. 2012;7(6):e38697.

- 928 12. Lefeldt N, Heyers D, Schneider NL, Engels S, Elbers D, Mouritsen H. Magnetic field-  
929 driven induction of ZENK in the trigeminal system of pigeons (*Columba livia*). *J R Soc*  
930 *Interface*. 2014 Nov 6;11(100):20140777.
- 931 13. Nimpf S, Nordmann GC, Kagerbauer D, Malkemper EP, Landler L, Papadaki-  
932 Anastasopoulou A, et al. A Putative Mechanism for Magnetoreception by  
933 Electromagnetic Induction in the Pigeon Inner Ear. *Curr Biol*. 2019  
934 Dezember;29(23):4052-4059.e4.
- 935 14. Kobylkov D, Schwarze S, Michalik B, Winklhofer M, Mouritsen H, Heyers D. A newly  
936 identified trigeminal brain pathway in a night-migratory bird could be dedicated to  
937 transmitting magnetic map information. *Proc R Soc B Biol Sci*. 2020 Jan  
938 29;287(1919):20192788.
- 939 15. Semm P, Demaine C. Neurophysiological properties of magnetic cells in the pigeon's  
940 visual system. *J Comp Physiol A*. 1986 Sep 1;159(5):619–25.
- 941 16. Ramírez E, Marín G, Mpodozis J, Letelier JC. Extracellular recordings reveal absence of  
942 magneto sensitive units in the avian optic tectum. *J Comp Physiol A*. 2014 Dec  
943 1;200(12):983–96.
- 944 17. Wu LQ, Dickman JD. Neural correlates of a magnetic sense. *Science*. 2012 May  
945 25;336(6084):1054–7.
- 946 18. Walker MM, Diebel CE, Haugh CV, Pankhurst PM, Montgomery JC, Green CR. Structure  
947 and function of the vertebrate magnetic sense. *Nature*. 1997 Nov;390(6658):371–6.
- 948 19. Hellinger J, Hoffmann KP. Magnetic field perception in the rainbow trout *Oncorhynchus*  
949 *mykiss*: magnetite mediated, light dependent or both? *J Comp Physiol A Neuroethol*  
950 *Sens Neural Behav Physiol*. 2012 Aug;198(8):593–605.
- 951 20. Kirschvink JL. Uniform magnetic fields and double-wrapped coil systems: Improved  
952 techniques for the design of bioelectromagnetic experiments. *Bioelectromagnetics*.  
953 1992;13(5):401–11.
- 954 21. QST. 3-Axis Magnetic Sensor QMC5883L. QST Corp.; 2016.
- 955 22. Bohlinger MJ, Bratland TK, Wan H. Magnetic field sensing device [Internet].  
956 US6529114B1, 2003 [cited 2022 Mar 8]. Available from:  
957 <https://patents.google.com/patent/US6529114B1/en?q=US+6%2c529%2c114+B1>
- 958 23. Honeywell. 3-Axis Digital Compass IC HMC5883L. Honeywell Inc.; 2013.
- 959 24. Microchip Technology Inc. Datasheet ATmega48/V/88/V/168/V [Internet]. 2018.  
960 Available from: [https://ww1.microchip.com/downloads/en/DeviceDoc/Atmel-7530-](https://ww1.microchip.com/downloads/en/DeviceDoc/Atmel-7530-Automotive-Microcontrollers-ATmega48-ATmega88-ATmega168_Datasheet.pdf)  
961 [Automotive-Microcontrollers-ATmega48-ATmega88-ATmega168\\_Datasheet.pdf](https://ww1.microchip.com/downloads/en/DeviceDoc/Atmel-7530-Automotive-Microcontrollers-ATmega48-ATmega88-ATmega168_Datasheet.pdf)
- 962 25. FTDI. FT232R USB UART IC. Future Technology Devices International Ltd; 2020.
- 963 26. Honeywell. AN212 “Handling of Sensor Bridge Offset.” Honeywell Inc.; 2010.
- 964 27. Honeywell. AN215 “Cross Axis Effect for AMR Magnetic Sensors.” Honeywell Inc.; 2010.
- 965 28. Ozyagcilar T. Calibrating an eCompass in the Presence of Hard- and Soft-Iron  
966 Interference. Freescale Semiconductor; 2015.
- 967 29. Vitali A. DT0059 Ellipsoid or sphere fitting for sensor calibration. STMicroelectronics;  
968 2018.
- 969 30. Kirschvink JL, Winklhofer M, Walker MM. Biophysics of magnetic orientation:  
970 strengthening the interface between theory and experimental design. *J R Soc Interface*.  
971 2010 Apr 6;7(suppl\_2):S179–91.
- 972 31. Texas Instruments. OPA548 High-Voltage, High-Current Operational Amplifier. Texas  
973 Instruments Inc.; 2019.
- 974 32. Rothwell JC. Techniques and mechanisms of action of transcranial stimulation of the  
975 human motor cortex. *J Neurosci Methods*. 1997 Jun 27;74(2):113–22.
- 976 33. Stett A, Barth W, Weiss S, Haemmerle H, Zrenner E. Electrical multisite stimulation of  
977 the isolated chicken retina. *Vision Res*. 2000;40(13):1785–95.
- 978 34. Field GD, Sher A, Gauthier JL, Greschner M, Shlens J, Litke AM, et al. Spatial properties  
979 and functional organization of small bistratified ganglion cells in primate retina. *J Neurosci*  
980 *Off J Soc Neurosci*. 2007 Nov 28;27(48):13261–72.
- 981 35. Litke AM, Bezayiff N, Chichilnisky EJ, Cunningham W, Dabrowski W, Grillo AA, et al.  
982 What does the eye tell the brain?: Development of a system for the large-scale recording

- 983 of retinal output activity. *IEEE Trans Nucl Sci.* 2004 Aug;51(4):1434–40.
- 984 36. Engels S, Schneider NL, Lefeldt N, Hein CM, Zapka M, Michalik A, et al. Anthropogenic  
985 electromagnetic noise disrupts magnetic compass orientation in a migratory bird. *Nature.*  
986 2014 May;509(7500):353–6.
- 987 37. Schwarze S, Schneider NL, Reichl T, Dreyer D, Lefeldt N, Engels S, et al. Weak  
988 Broadband Electromagnetic Fields are More Disruptive to Magnetic Compass  
989 Orientation in a Night-Migratory Songbird (*Erithacus rubecula*) than Strong Narrow-Band  
990 Fields. *Front Behav Neurosci* [Internet]. 2016 [cited 2022 Apr 1];10. Available from:  
991 <https://www.frontiersin.org/article/10.3389/fnbeh.2016.00055>
- 992 38. Chernetsov N, Pakhomov A, Kobylkov D, Kishkinev D, Holland RA, Mouritsen H.  
993 Migratory Eurasian Reed Warblers Can Use Magnetic Declination to Solve the Longitude  
994 Problem. *Curr Biol.* 2017 Sep 11;27(17):2647-2651.e2.
- 995 39. Leberecht B, Kobylkov D, Karwinkel T, Döge S, Burnus L, Wong SY, et al. Broadband  
996 75–85 MHz radiofrequency fields disrupt magnetic compass orientation in night-  
997 migratory songbirds consistent with a flavin-based radical pair magnetoreceptor. *J Comp*  
998 *Physiol A.* 2022 Jan 1;208(1):97–106.
- 999 40. Capstick M, Schär P, Schuermann D, Romann A, Kuster N. ELF exposure system for  
1000 live cell imaging. *Bioelectromagnetics.* 2013;34(3):231–9.
- 1001 41. Ahlers MT, Ammermüller J. A system for precise temperature control of isolated nervous  
1002 tissue under optical access: Application to multi-electrode recordings. *J Neurosci*  
1003 *Methods.* 2013 Sep 30;219(1):83–91.
- 1004 42. Fenton GE, Nath K, Malkemper EP. Electrophysiology and the magnetic sense: a guide  
1005 to best practice. *J Comp Physiol A* [Internet]. 2021 Oct 29 [cited 2022 Mar 7]; Available  
1006 from: <https://doi.org/10.1007/s00359-021-01517-y>
- 1007 43. Mouritsen H, Feenders G, Liedvogel M, Kropp W. Migratory Birds Use Head Scans to  
1008 Detect the Direction of the Earth's Magnetic Field. *Curr Biol.* 2004 Nov 9;14(21):1946–9.
